# Supplementary material
Source: Royal Society of Chemistry journal article supplement (doi:10.1039/d6ya00006a)
Supplement: d6ya00006a1.pdf [file d6ya00006a1.pdf]

## Supporting Information

### Role of pH in Tailoring Ni-Co Hydroxide Nanostructures for Energy Storage Applications

Rajkamal Arya<sup>a\*</sup>, Tanya Dagar<sup>b</sup>, Arpit Thomas<sup>c,d</sup>, M.N Singh<sup>e</sup>, A. K. Sinha<sup>a\*</sup>  
Harpreet Singh Arora<sup>c\*</sup>

<sup>a\*</sup>Department of Physics, School of Advanced Engineering, UPES, Dehradun,  
Uttarakhand-248007, India

<sup>b</sup>Department of Chemistry, School of Advanced Engineering, UPES, Dehradun,  
Uttarakhand-248007, India

<sup>c</sup>Department of Mechanical Engineering, Shiv Nadar Institution of Eminence,  
deemed to be University, India (UP)- 201310

<sup>d</sup>Centre for Inter-Disciplinary Research and Innovation, University of Petroleum  
and Energy Studies, Bidholi Via-Prem Nagar, Dehradun-248007

<sup>e</sup>Accelerator Physics and Synchrotron Utilization Division, Raja Ramanna  
Centre for Advanced Technology, Indore 452013, India

**Table S1:** Comparing NCH with Known Supercapacitor Electrode Materials

| Materials                                 | Synthetic route                  | Specific Capacitance (F g <sup>-1</sup> ) | Current Density (A g <sup>-1</sup> ) | Capacitance Retention at High Rate (%) | References   |
|-------------------------------------------|----------------------------------|-------------------------------------------|--------------------------------------|----------------------------------------|--------------|
| NiCo(OH) <sub>4</sub> (NCH-2)             | Co-precipitation/Hydrothermal    | 621                                       | 0.5                                  | 64 % at 10 A g <sup>-1</sup>           | This Work    |
| NiCo <sub>2</sub> O <sub>4</sub> Nanorods | Hydrothermal                     | 435                                       | 1.0                                  | 83.4 % at 1A g <sup>-1</sup>           | <sup>1</sup> |
| Ni-Co LDHs                                | Electrodeposition                | 690                                       | 1.0                                  | 60 % at 10 A g <sup>-1</sup>           | <sup>2</sup> |
| Cu(OH) <sub>2</sub> @NiCo-OH hierarchical | Electrodeposition + wet chemical | 770                                       | 5.0                                  | 95.8% over 6000 cycles                 | <sup>3</sup> |
| Ni-Fe -LDH                                | Co-precipitation                 | 1368                                      | 1.0                                  | 87.5% over 5000 cycles                 | <sup>4</sup> |
| Ni/Co hydroxide-(oxy)hydroxide            | Co-precipitation                 | 566                                       | 1.0                                  | 84 % over 10000 cycles                 | <sup>5</sup> |

**Table S2:** Phase Composition and Structural Parameters of NCH Samples.

| Samples | $\alpha$ -phase Concentration (%) | $\beta$ -phase Concentration (%) | $\alpha$ -phase Particle Size (nm) | $\beta$ -phase Particle Size (nm) | $\beta$ -phase micro-strain (%) |
|---------|-----------------------------------|----------------------------------|------------------------------------|-----------------------------------|---------------------------------|
| NCH-1   | 37.5                              | 62.5                             | 12.6                               | 45.4                              | 0.145                           |
| NCH-2   | 12.8                              | 87.2                             | 15.3                               | 32.0                              | 0.063                           |
| NCH-3   | 26.0                              | 74.0                             | 15.8                               | 32.8                              | 0.069                           |
| NCH-4   | 94.9                              | 5.1                              | 10.2                               | 31.9                              | -                               |

**Table S3:** BET and BJH Surface Area, Pore Volume of NCH Samples.

| Samples | Pore Volume (cm <sup>3</sup> /g) | Specific Surface Area (BET) (m <sup>2</sup> /g) | Specific Surface Area (BJH) (m <sup>2</sup> /g) |
|---------|----------------------------------|-------------------------------------------------|-------------------------------------------------|
| NCH-1   | 0.058                            | 22.11                                           | 28.03                                           |
| NCH-2   | 0.055                            | 12.83                                           | 13.86                                           |
| NCH-3   | 0.186                            | 42.55                                           | 48.50                                           |
| NCH-4   | 0.297                            | 52.32                                           | 59.54                                           |

**Table S4:** Kinetic parameters and charge storage contributions (SCP and DIP) of NCH samples obtained from CV analysis.

| Sample | Process  | b-value | b <sub>2</sub> (Capacitive) | b <sub>1</sub> (Diffusion) | SCP (%) | DIP (%) |
|--------|----------|---------|-----------------------------|----------------------------|---------|---------|
| NCH-1  | Anodic   | 0.50    | 0.99 ± 0.01                 | -                          | -       | 100     |
| NCH-1  | Cathodic | -       | -                           | -                          | -       | -       |
| NCH-2  | Anodic   | 0.61    | 0.82 ± 0.06                 | 3.18 ± 0.16                | 20      | 80      |
| NCH-2  | Cathodic | 0.56    | 0.86 ± 0.06                 | 2.88 ± 0.18                | 23      | 77      |
| NCH-3  | Anodic   | 0.60    | 0.70 ± 0.05                 | 3.92 ± 0.18                | 15      | 85      |
| NCH-3  | Cathodic | 0.57    | 0.74 ± 0.05                 | 3.48 ± 0.19                | 17      | 83      |

|       |          |      |                 |                 |    |    |
|-------|----------|------|-----------------|-----------------|----|----|
| NCH-4 | Anodic   | 0.64 | $0.62 \pm 0.05$ | $4.70 \pm 0.20$ | 12 | 88 |
| NCH-4 | Cathodic | 0.64 | $0.58 \pm 0.06$ | $3.65 \pm 0.28$ | 14 | 86 |

**Table S5:** Specific capacitance of NCH samples at various current densities.

| Current Density (A/g) | NCH-1 (F/g) | NCH-2 (F/g) | NCH-3 (F/g) | NCH-4 (F/g) |
|-----------------------|-------------|-------------|-------------|-------------|
| 0.5                   | -           | 621         | 480         | 343         |
| 1                     | 388         | 552         | -           | 127         |
| 2                     | 314         | 506         | 440         | 110         |
| 3                     | -           | -           | 366         | 105         |
| 5                     | 161         | 462         | 313         | 88          |
| 6                     | -           | 405         | -           | -           |
| 10                    | 110         | 400         | 250         | 75          |
| 15                    | 98          | -           | 225         | 38          |

**Table S6:** Electrochemical impedance spectroscopy (EIS) fitting parameters of NCH samples obtained using the equivalent circuit model, along with chi-square ( $\chi^2$ ) values indicating fitting quality.

| Samples | $R_s$ ( $\Omega$ ) | $R_{ct}$ ( $\Omega$ ) | CPE-T   | CPE-P | $Z_{W0-R}$ ( $\Omega$ ) | $Z_{W0-T}$ | $Z_{W0-P}$ | Chi-square error ( $\chi^2$ ) |
|---------|--------------------|-----------------------|---------|-------|-------------------------|------------|------------|-------------------------------|
| NCH-1   | 0.50               | 4.73                  | 0.00258 | 0.41  | 32.3                    | 48.8       | 0.66       | $6.7 \times 10^{-4}$          |
| NCH-2   | 0.21               | 0.38                  | 0.07    | 0.72  | 57                      | 44         | 0.51       | $4.2 \times 10^{-4}$          |
| NCH-3   | 0.45               | 0.52                  | 0.50    | 0.97  | 70                      | 60         | 0.78       | $6.9 \times 10^{-3}$          |
| NCH-4   | 0.42               | 4.30                  | 0.36    | 0.93  | 50                      | 61         | 0.80       | $8.2 \times 10^{-4}$          |

**Table S7:** Figure 1 Specific capacitance, energy density, and power density of the NCH-2 symmetric coin cell device at different current densities.

| Current Density (A g <sup>-1</sup> ) | Specific Capacitance (F g <sup>-1</sup> ) | Energy Density (Wh kg <sup>-1</sup> ) | Power Density (W kg <sup>-1</sup> ) |
|--------------------------------------|-------------------------------------------|---------------------------------------|-------------------------------------|
| 0.25                                 | 22.0                                      | 6.86                                  | 178                                 |
| 0.50                                 | 20.6                                      | 6.43                                  | 618                                 |
| 0.75                                 | 17.5                                      | 5.47                                  | 547                                 |
| 1.00                                 | 10.0                                      | 3.13                                  | 714                                 |

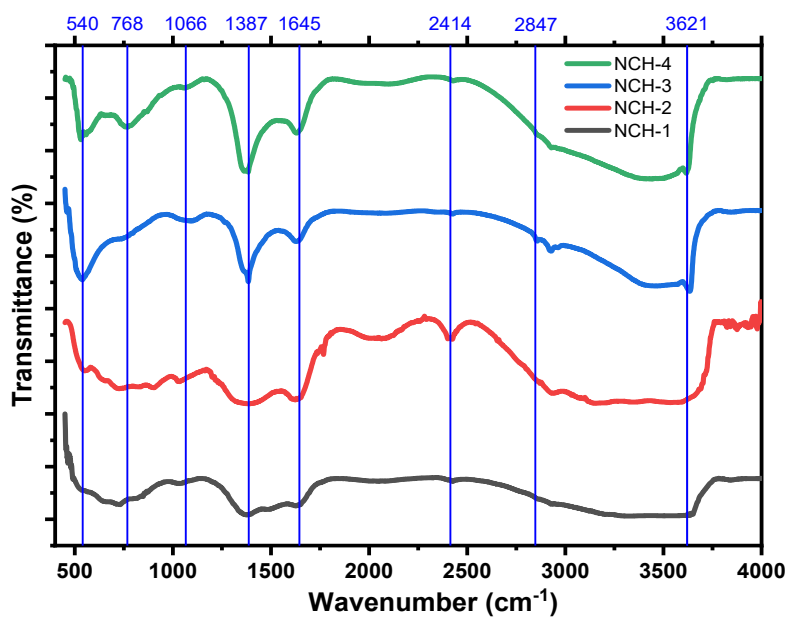

**Figure S1:** FTIR Spectrum of NCH samples

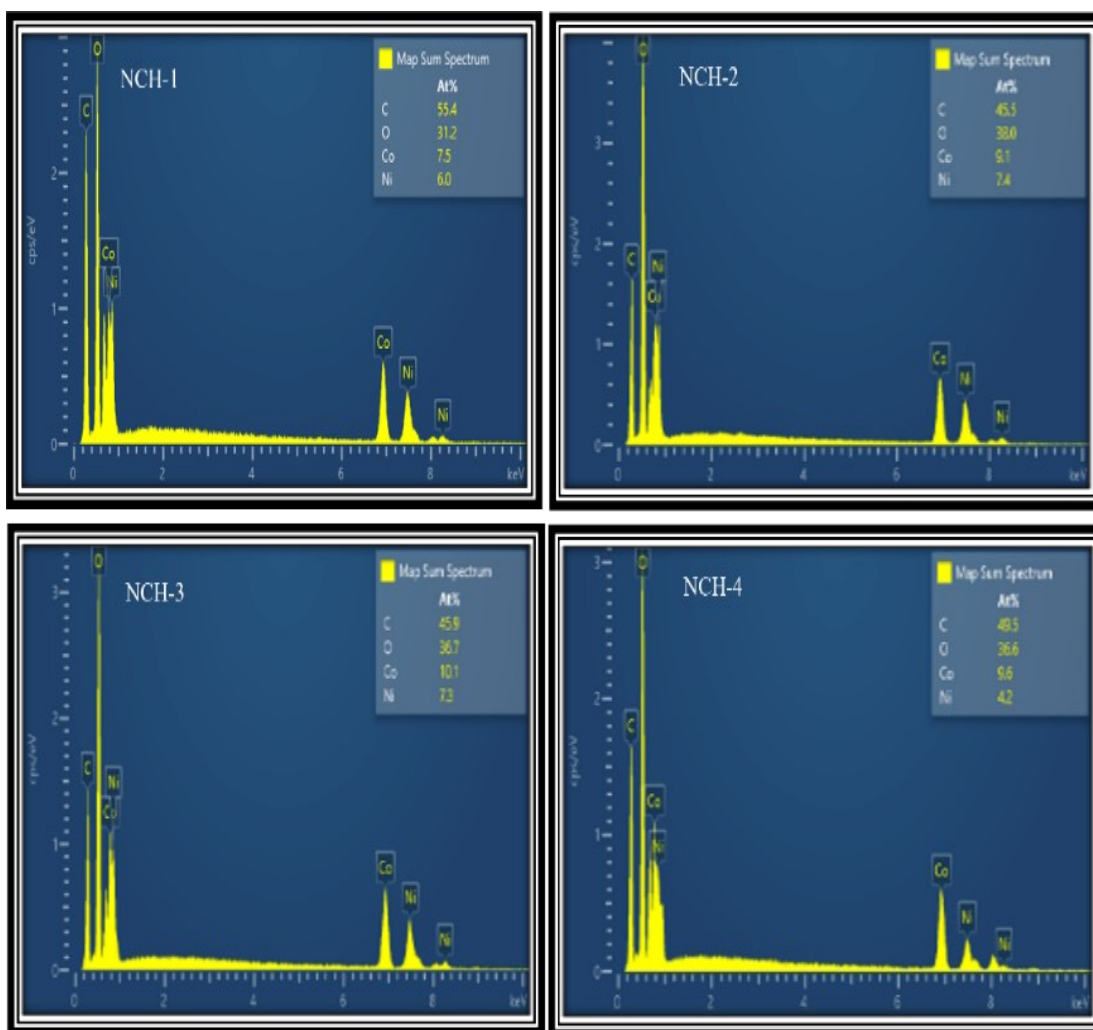

*Figure S2: EDX elemental mapping images of NCH samples.*

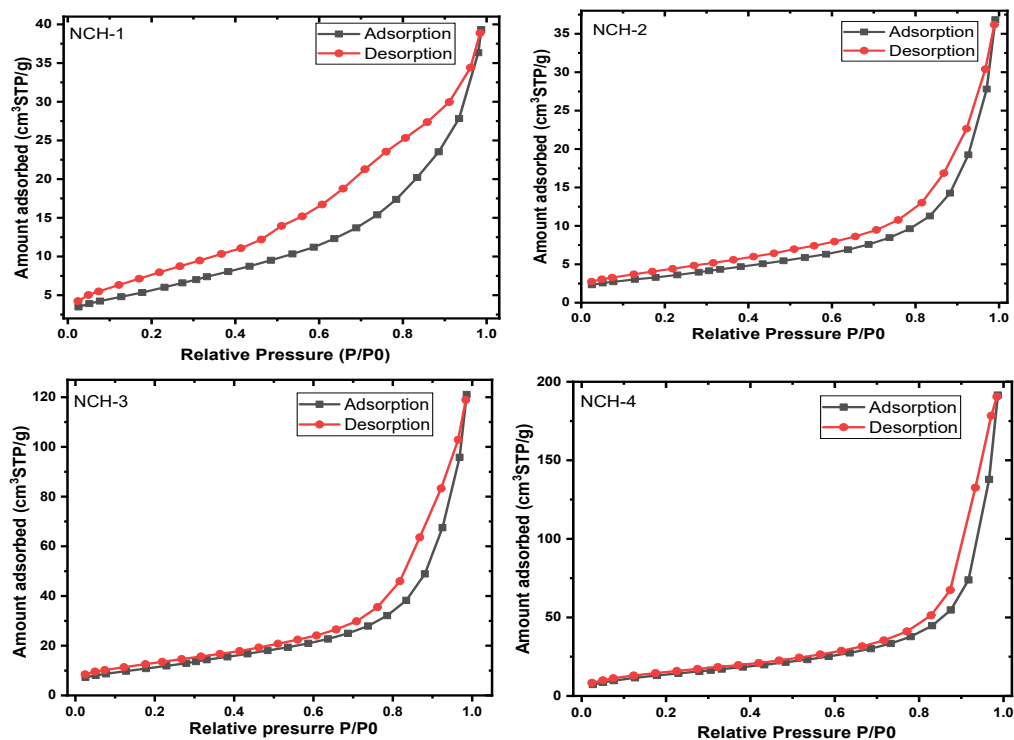

*Figure S3: Adsorption-desorption isotherms plot of NCH samples*

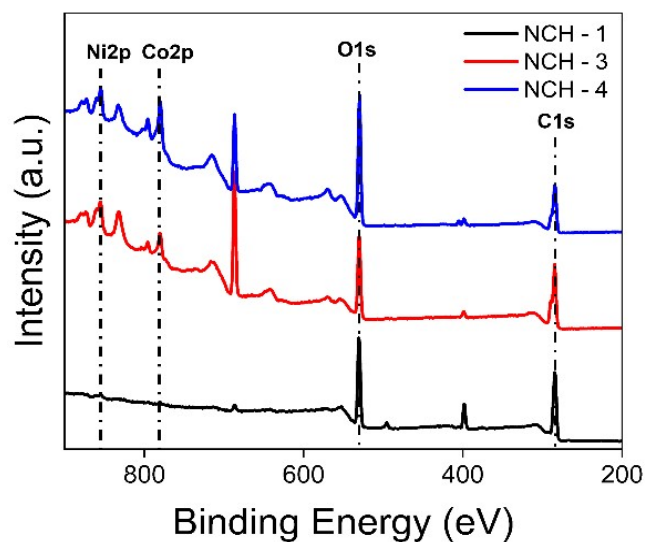

*Figure S4: XPS Survey scan of NCH-1, 3, 5 samples*

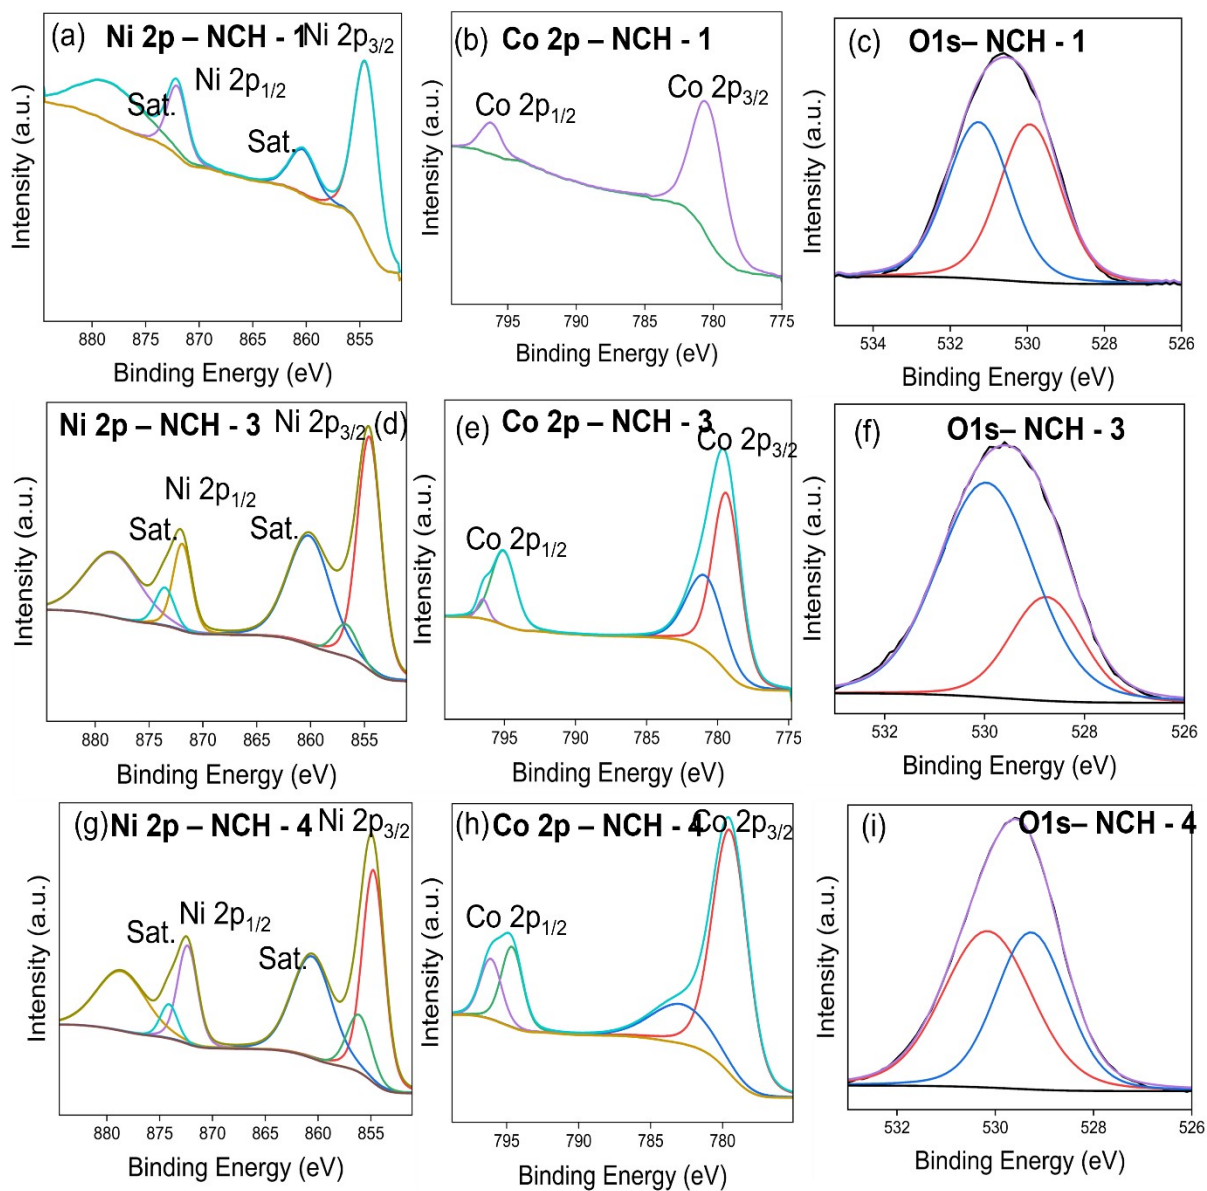

**Figure S5:** XPS spectrum of (a-c) NCH-1, (d-f) NCH-3, (g-i) NCH-4 samples respectively

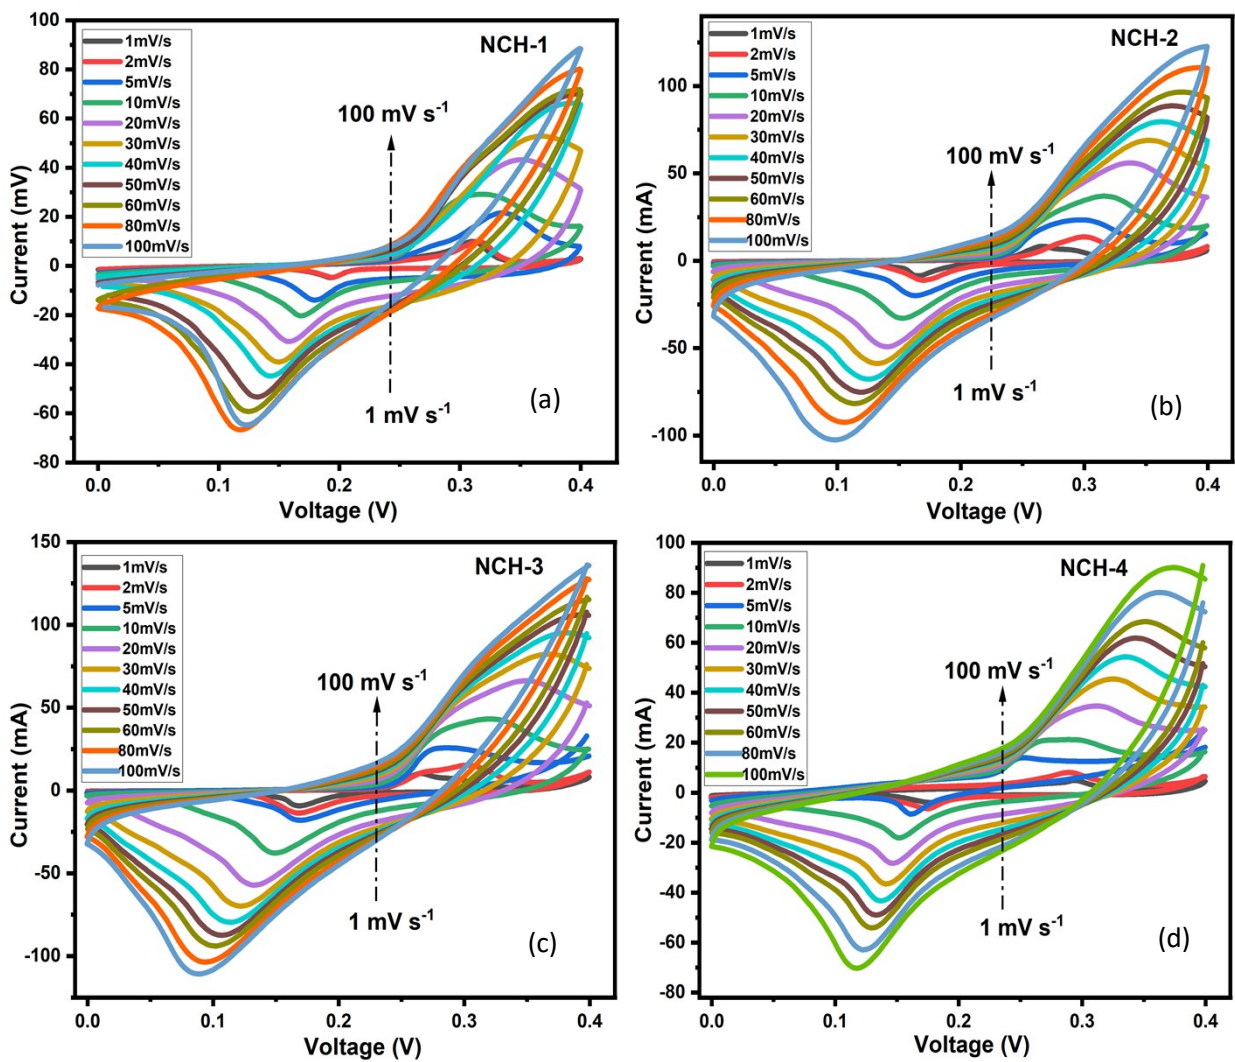

*Figure S6: (a-d) Cyclic voltammetry plot of NCH samples from 1 to 100 mV/s.*

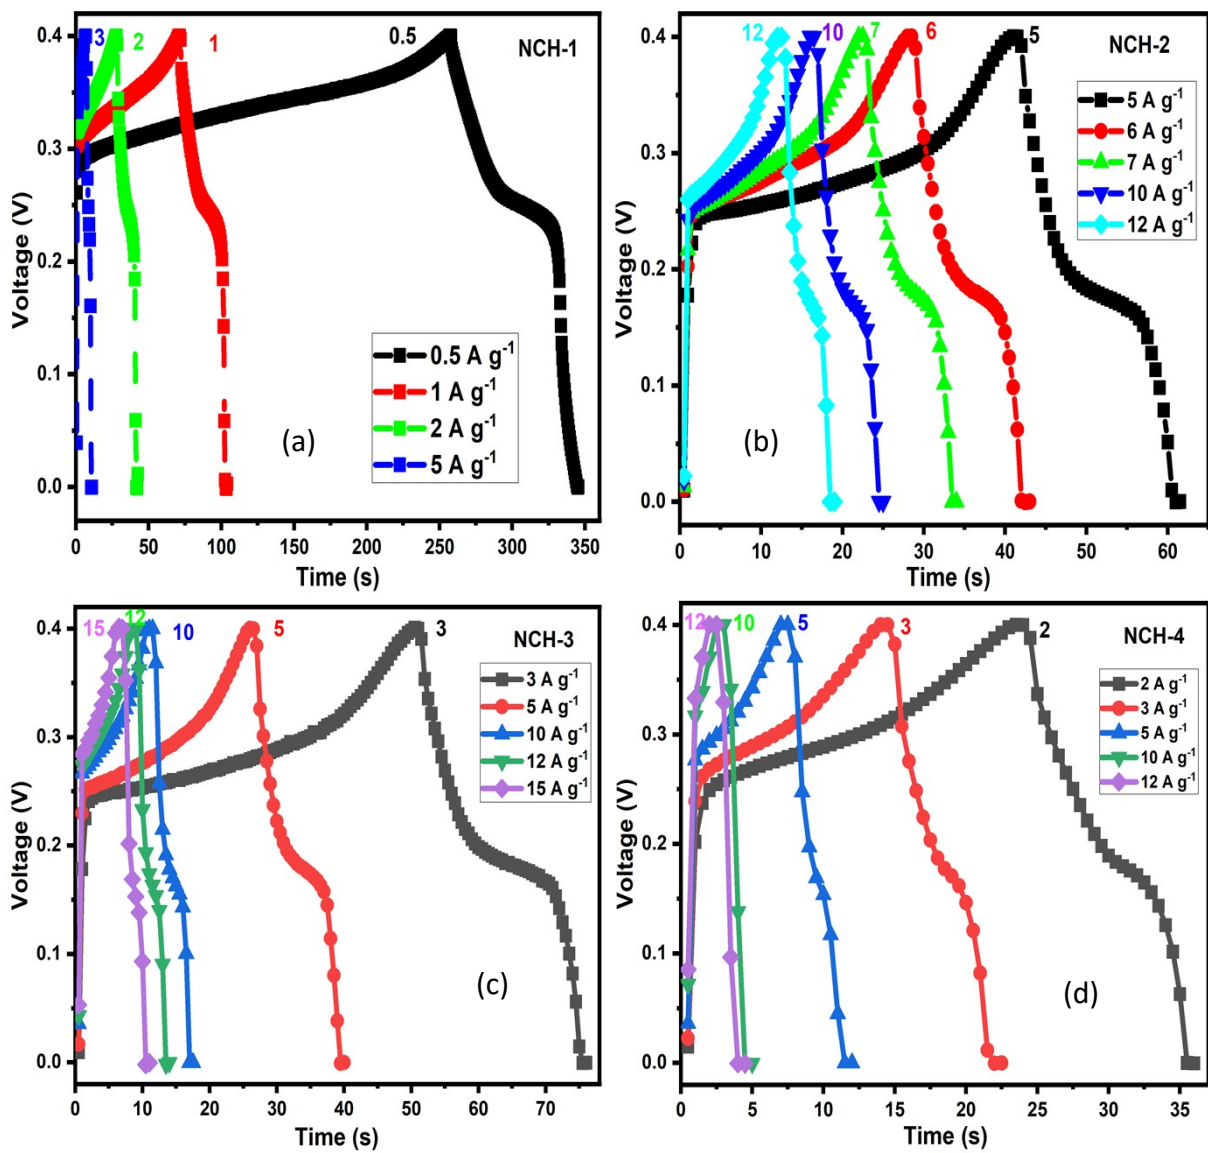

*Figure S7: GCD plot of NCH samples at various current densities*

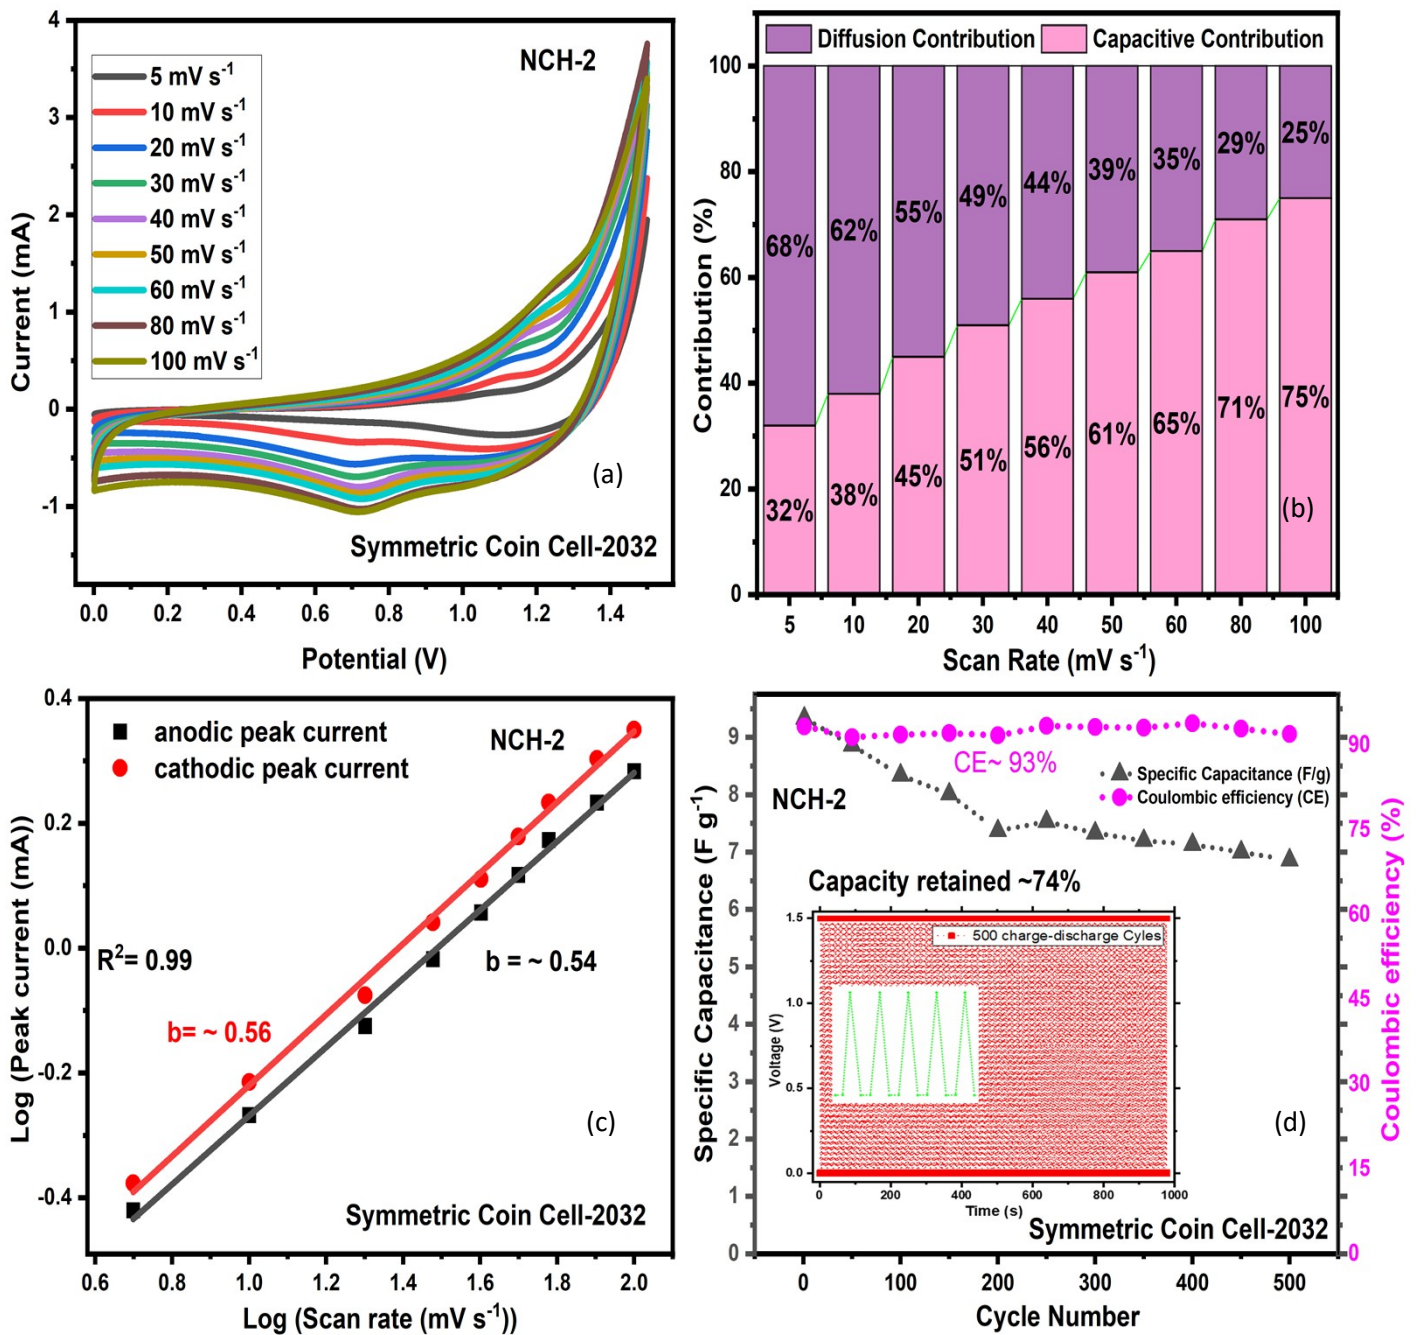

**Figures S8:** Electrochemical performance of symmetric NCH-2 Coin Cell-2032 device (a) CV from various scan rates, (b) Capacitive-Diffusive controlled process in supercapacitor, (c) Log-log plot between Peak current and Scan rate, (d) Cyclic stability, and Coulombic efficiency. (Inset: 500 Charge-discharge cycles)

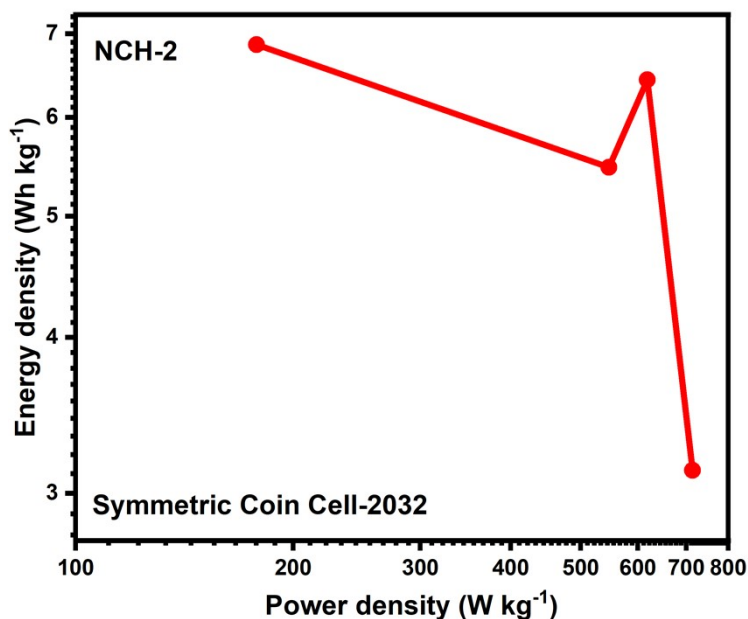

**Figure S9:** Ragone plot of the NCH-2 symmetric CR-2032 device.

## References:

- 1 S. Savithri, P. Remya, S. Vanitharaj, S. Selvakumar, P. Krishnan, S. Sudharthini, V. P. Venkatesh, R. Balaji and R. Nithya, *Chem. Phys. Lett.*, 2025, **869**, 142028.
- 2 C. Xu, J. Li, K. Yang, X. Zhao and M. Liu, *J. Mater. Chem. A Mater.*, 2014, **2**, 2162–2168.
- 3 X. Su, H. Shi, Y. Xu, D. Zhang, Z. Guo, J. Yu, J. Sui, Q. Zhang, L. Yu and L. Dong, *Journal of Electroanalytical Chemistry*, 2026, **1000**, 119593.
- 4 B. R. Wiston, P. Prabhakaran and M. Ashok, *J. Energy Storage*, 2022, **50**, 104226.
- 5 A. Roy, H. R. Inta, S. Ghosh, H. V. S. R. M. Koppiseti, A. Mondal, B. R. Verma, S. Bag and V. Mahalingam, *J. Mater. Chem. A Mater.*, 2024, **12**, 4086–4098.
